# Supplementary material
Source: publisher figshare collection journal article supplement (https://tandf.figshare.com/ndownloader/files/32516668)
Supplement: Supplementary file 1 [file 32516668]

Supplemental material

*Distance from recurrence to organs at risk*

*The distance from the relapsing tumour to the nearest OARs, distributed in groups of less or more than 10 mm distance. Furthermore, an overview of modified target volumes in the groups. OARs: Organs at risk, CTV: Clinical target volume, PTV: planning target volume*

|  | Total | Modified CTV | Modified PTV |
| --- | --- | --- | --- |
| All analysed recurrences | 39 (100) | 9 | 8 |
| ≤ 10 mm from critical OARs | 25 (64) | 5 | 5 |
| > 10 mm from critical OARs | 14 (36) | 4 | 3 |
